# Supplementary material for: Loss of histone methyltransferase SETD1B in oogenesis results in the redistribution of genomic histone 3 lysine 4 trimethylation
Source: PubMed Central journal article supplement (PMC8887468; doi:10.1093/nar/gkac051), 2022-02-07

## Supplementary Item Legends

**Supplementary Table 1.** Raw and uniquely mapped read depths are provided for all sequencing libraries generated for this study. PBAT: post-bisulphite adaptor tagging

**Supplementary Table 2.** Correlation matrix of R-values for all replicates of single cell RNA-seq. All oocyte transcripts were quantitated using log<sub>2</sub>RPM.

**Supplementary Figure 1. (A)** Hierarchical clustering for H3K4me3 ChIP-seq replicates in *Setd1b* WT (N=3) and *Setd1b* cKO (N=3) GV oocytes, and 10% input replicates (N=4). Clustering was done using 5kb running windows and enrichment normalised RPKM. **(B)** The screenshot shows the normalised enrichment for H3K4me3 for 1kb running windows with a 500bp step in the *Setd1b* cKO and WT GV oocyte replicates. Significant differentially enriched 5kb windows are shown in the *Setd1b* gain/loss track, with red and blue bars showing windows that gain and lose H3K4me3 in *Setd1b* cKO, respectively. **(C)** Top: pie charts show the proportion of 5kb windows that gain (left) or lose (middle) H3K4me3 in the *Setd1b* cKO GV oocytes that overlap transcription start sites (TSSs) or genic regions, compared to a random set (right) of 5kb windows ( $p < 0.0001$  and  $p < 0.0001$ , respectively, Chi-square). Bottom: pie charts show the proportion of the inter-genic 5kb windows that gain (left) or lose (middle) H3K4me3 in the *Setd1b* cKO GV oocytes that overlap combinatorial peaks for histone modifications in GV oocytes (Hanna et al., 2018), compared to the inter-genic random (right) 5kb windows ( $p < 0.0001$  and  $p < 0.0001$ , respectively, Chi-square). **(D)** The scatterplot shows enrichment for H3K27ac and H3K27me3 for 5kb running windows (normalised RPKM) in d25 GV oocytes. The windows that gain and lose H3K4me3 in the *Setd1b* cKO are highlighted in red and blue, respectively. **(E)** The barplot shows the relative enrichment for dimer content in regions that gain H3K4me3 in the *Setd1b* cKO compared to a random set of 5kb probes.

**Supplementary Figure 2. (A)** The heatmap shows DEGs in the *Setd1b* cKO and WT GV oocyte replicates, quantitated as per gene-normalised log<sub>2</sub>RPKM. **(B)** The boxplot shows the log<sub>2</sub> fold change in gene expression between the *Setd1b* cKO and WT for TSSs that overlap regions that gain (N=415), lose (N=914) or were unchanged (N= 26,428) for H3K4me3 in the *Setd1b* cKO GV oocytes. Pair-wise comparisons between gain and unchanged and loss and unchanged were done with two-tailed t-test ( $p = 7.3E-8$  and  $p = 1.4E-14$ , respectively). **(C)** Principal component analysis shows scRNA-seq replicates for *Setd1b* cKO GV (N=4), *Setd1b* WT GV (N=3), *Setd1b* cKO MII (N=4), and *Setd1b* WT MII (N=4) oocytes. Expression of oocyte transcripts were quantitated using log<sub>2</sub>RPM. **(D)** The scatterplot shows log<sub>2</sub> fold change (cKO/WT) in gene expression (RPKM) for *Setd1b* cKO DEGs in *Setd1b* cKO GV and MII oocytes. **(E)** The barplot shows the average gene expression for H3K4 methyltransferases (*Setd1a*, *Mll1*, *Mll2*, *Mll3*, *Mll4*), H3K4 methyltransferase complex subunits (*Cxxc1*, *Rbbp5*, *Ash2l*, *Wdr5*, *Dpy30*), and *de novo* DNA methyltransferases (*Dnmt3a*, *Dnmt3b*, *Dnmt3l*) in *Setd1b* cKO and WT GV oocytes. The whiskers show standard deviation between biological replicates, while the asterisks shows those genes that are significant DEGs.

**Supplementary Figure 3. (A)** The Venn diagrams show the overlap between genes upregulated in oogenesis and up- and downregulated DEGs in *Setd1b* cKO GV oocytes. **(B)** The Venn diagrams show the overlap between genes upregulated in oogenesis and up- and downregulated DEGs in *Cxxc1* cKO GV oocytes. **(C)** The Venn diagrams show the overlap between up- and downregulated DEGs in the *Cxxc1* cKO GV oocytes with up- and downregulated DEGs in *Setd1b* cKO GV oocytes. **(D)** The scatterplot shows the log<sub>2</sub> fold change (cKO/WT) in gene expression (RPKM) for *Setd1b* cKO DEGs in the *Setd1b* cKO GV oocytes compared to the *Cxxc1* cKO GV oocytes. **(E)** The scatterplot shows the log<sub>2</sub> fold change (cKO/WT) in gene expression (RPKM) for *Setd1b* cKO DEGs in the *Setd1b* cKO GV oocytes compared to the *Mll2* cKO GV oocytes.

**Supplementary Figure 4. (A)** The scatterplot shows average normalised enrichment for H3K4me3 for 5kb running windows (N=544,879) between *Cxxc1* cKO (N=2) and WT (N=2) GV oocytes. Differentially enriched windows identified in *Setd1b* cKO are shown in blue (loss) and red (gain). **(B)** The screenshot shows the normalised enrichment for H3K4me3 for 1kb running windows with a 500bp step in *Setd1b*

cKO, *Setd1b* WT, *Cxxc1* cKO and *Cxxc1* WT GV oocytes. Significant differentially enriched 5kb windows are shown in the *Setd1b* gain/loss track, with red and blue bars showing windows that gain and lose H3K4me3 in *Setd1b* cKO, respectively. **(C)** The boxplot shows the H3K4me3 enrichment (normalised RPKM) in d5 non-growing oocytes (NGO), d10 growing oocyte (GO), d15 GV, d25 GV, *Setd1b* WT, *Setd1b* cKO, *Cxxc1* WT and *Cxxc1* cKO GV oocytes for 5kb windows that significantly gain (left) or lose (right) H3K4me3 in *Setd1b* cKO oocytes.

**Supplementary Figure 5. (A)** Hierarchical clustering for replicates of DNA methylation in *Setd1b* WT, *Setd1b* cKO, *Cxxc1* WT and *Cxxc1* cKO GV oocytes. Clustering was done using 100-CpG windows (excluding the Y chromosome) with a minimum coverage of 10-CpGs. **(B)** The scatterplot shows the DNA methylation in *Cxxc1* cKO and WT GV oocytes across 100-CpG windows, with at least 10 informative CpGs in grouped replicates. *Setd1b* hypomethylated (green) and hypermethylated (purple) differentially methylated regions (DMRs) are highlighted. **(C)** The screenshot shows DNA methylation of 100-CpG windows with at least 10 informative CpGs per replicate for *Setd1b* cKO and WT oocytes and per grouped replicate for *Cxxc1* cKO and WT GV oocytes. Regions that gain or lose DNA methylation (*Setd1b* cKO DMRs) are shown in the labelled annotation tracks as purple and green bars, respectively.

## Supplementary Tables

**Supplementary Table 1**

| Sample          | Library          | Raw Reads  | Uniquely mapped |
|-----------------|------------------|------------|-----------------|
| Setd1b WT rep1  | H3K4me3 ChIP-seq | 20,014,719 | 12,726,842      |
| Setd1b WT rep2  | H3K4me3 ChIP-seq | 40,103,864 | 10,579,220      |
| Setd1b WT rep4  | H3K4me3 ChIP-seq | 26,368,689 | 15,942,467      |
| Setd1b cKO rep1 | H3K4me3 ChIP-seq | 26,790,166 | 12,427,601      |
| Setd1b cKO rep3 | H3K4me3 ChIP-seq | 38,267,203 | 11,611,307      |
| Setd1b cKO rep4 | H3K4me3 ChIP-seq | 36,404,048 | 14,138,852      |
| Setd1b WT rep1  | PBAT             | 65,496,468 | 29,075,293      |
| Setd1b WT rep2  | PBAT             | 49,773,592 | 25,975,398      |
| Setd1b WT rep3  | PBAT             | 60,201,429 | 32,757,844      |
| Setd1b cKO rep1 | PBAT             | 69,046,033 | 29,903,629      |
| Setd1b cKO rep2 | PBAT             | 63,538,005 | 33,224,984      |
| Setd1b cKO rep3 | PBAT             | 68,637,891 | 34,873,524      |
| Setd1b WT rep1  | scRNA-seq        | 16,915,059 | 9,329,696       |
| Setd1b WT rep2  | scRNA-seq        | 17,712,949 | 9,726,867       |
| Setd1b WT rep3  | scRNA-seq        | 14,765,556 | 8,006,481       |
| Setd1b cKO rep1 | scRNA-seq        | 13,555,016 | 7,138,433       |
| Setd1b cKO rep2 | scRNA-seq        | 16,236,758 | 8,997,586       |
| Setd1b cKO rep3 | scRNA-seq        | 15,506,713 | 8,462,170       |
| Setd1b cKO rep4 | scRNA-seq        | 11,803,207 | 6,063,243       |

**Supplementary Table 2**

|              | Setd1b cKO 1 | Setd1b cKO 2 | Setd1b cKO 3 | Setd1b cKO 4 | Setd1b WT 1 | Setd1b WT 2 | Setd1b WT 3 |
|--------------|--------------|--------------|--------------|--------------|-------------|-------------|-------------|
| Setd1b cKO 1 | 1.000        | 0.958        | 0.952        | 0.941        | 0.941       | 0.938       | 0.936       |
| Setd1b cKO 2 | 0.958        | 1.000        | 0.957        | 0.930        | 0.945       | 0.941       | 0.929       |
| Setd1b cKO 3 | 0.952        | 0.957        | 1.000        | 0.938        | 0.937       | 0.935       | 0.931       |
| Setd1b cKO 4 | 0.941        | 0.930        | 0.938        | 1.000        | 0.916       | 0.917       | 0.936       |
| Setd1b WT 1  | 0.941        | 0.945        | 0.937        | 0.916        | 1.000       | 0.960       | 0.948       |
| Setd1b WT 2  | 0.938        | 0.941        | 0.935        | 0.917        | 0.960       | 1.000       | 0.948       |
| Setd1b WT 3  | 0.936        | 0.929        | 0.931        | 0.936        | 0.948       | 0.948       | 1.000       |

# Supplementary Figure 1

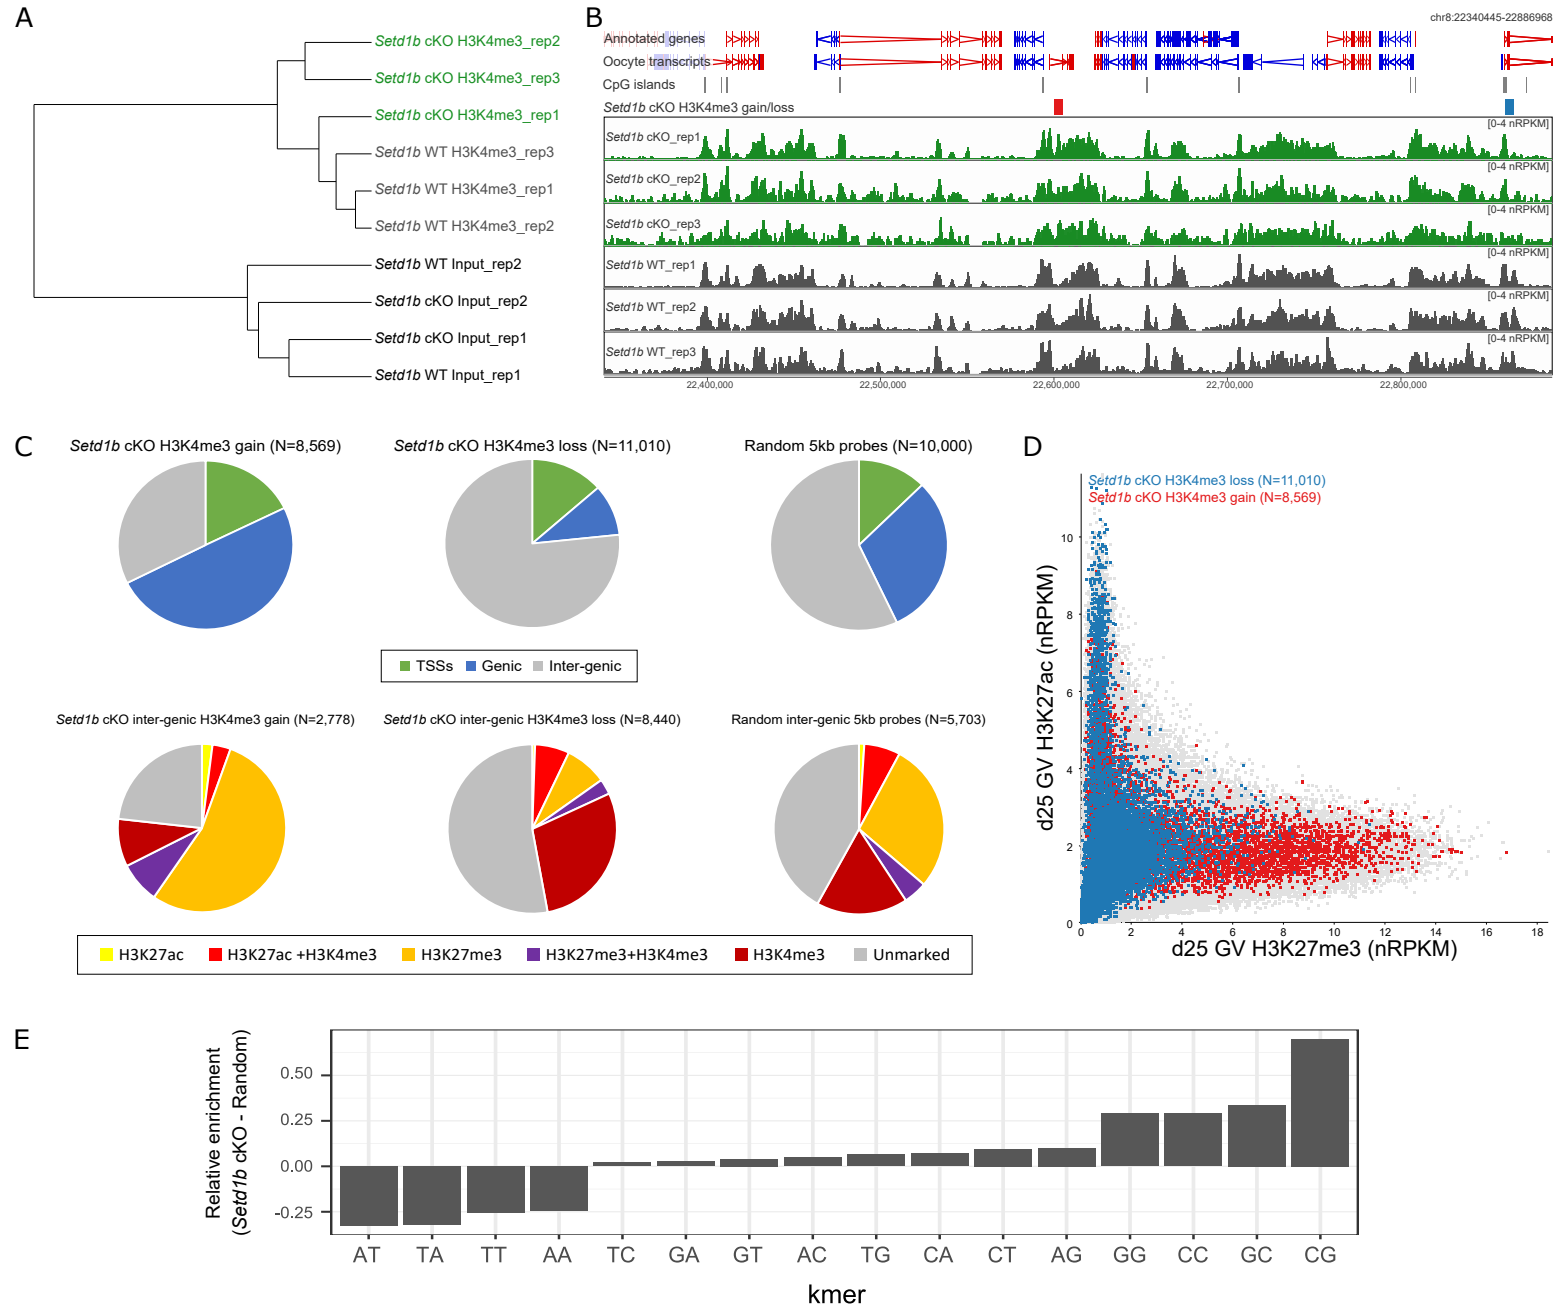

# Supplementary Figure 2

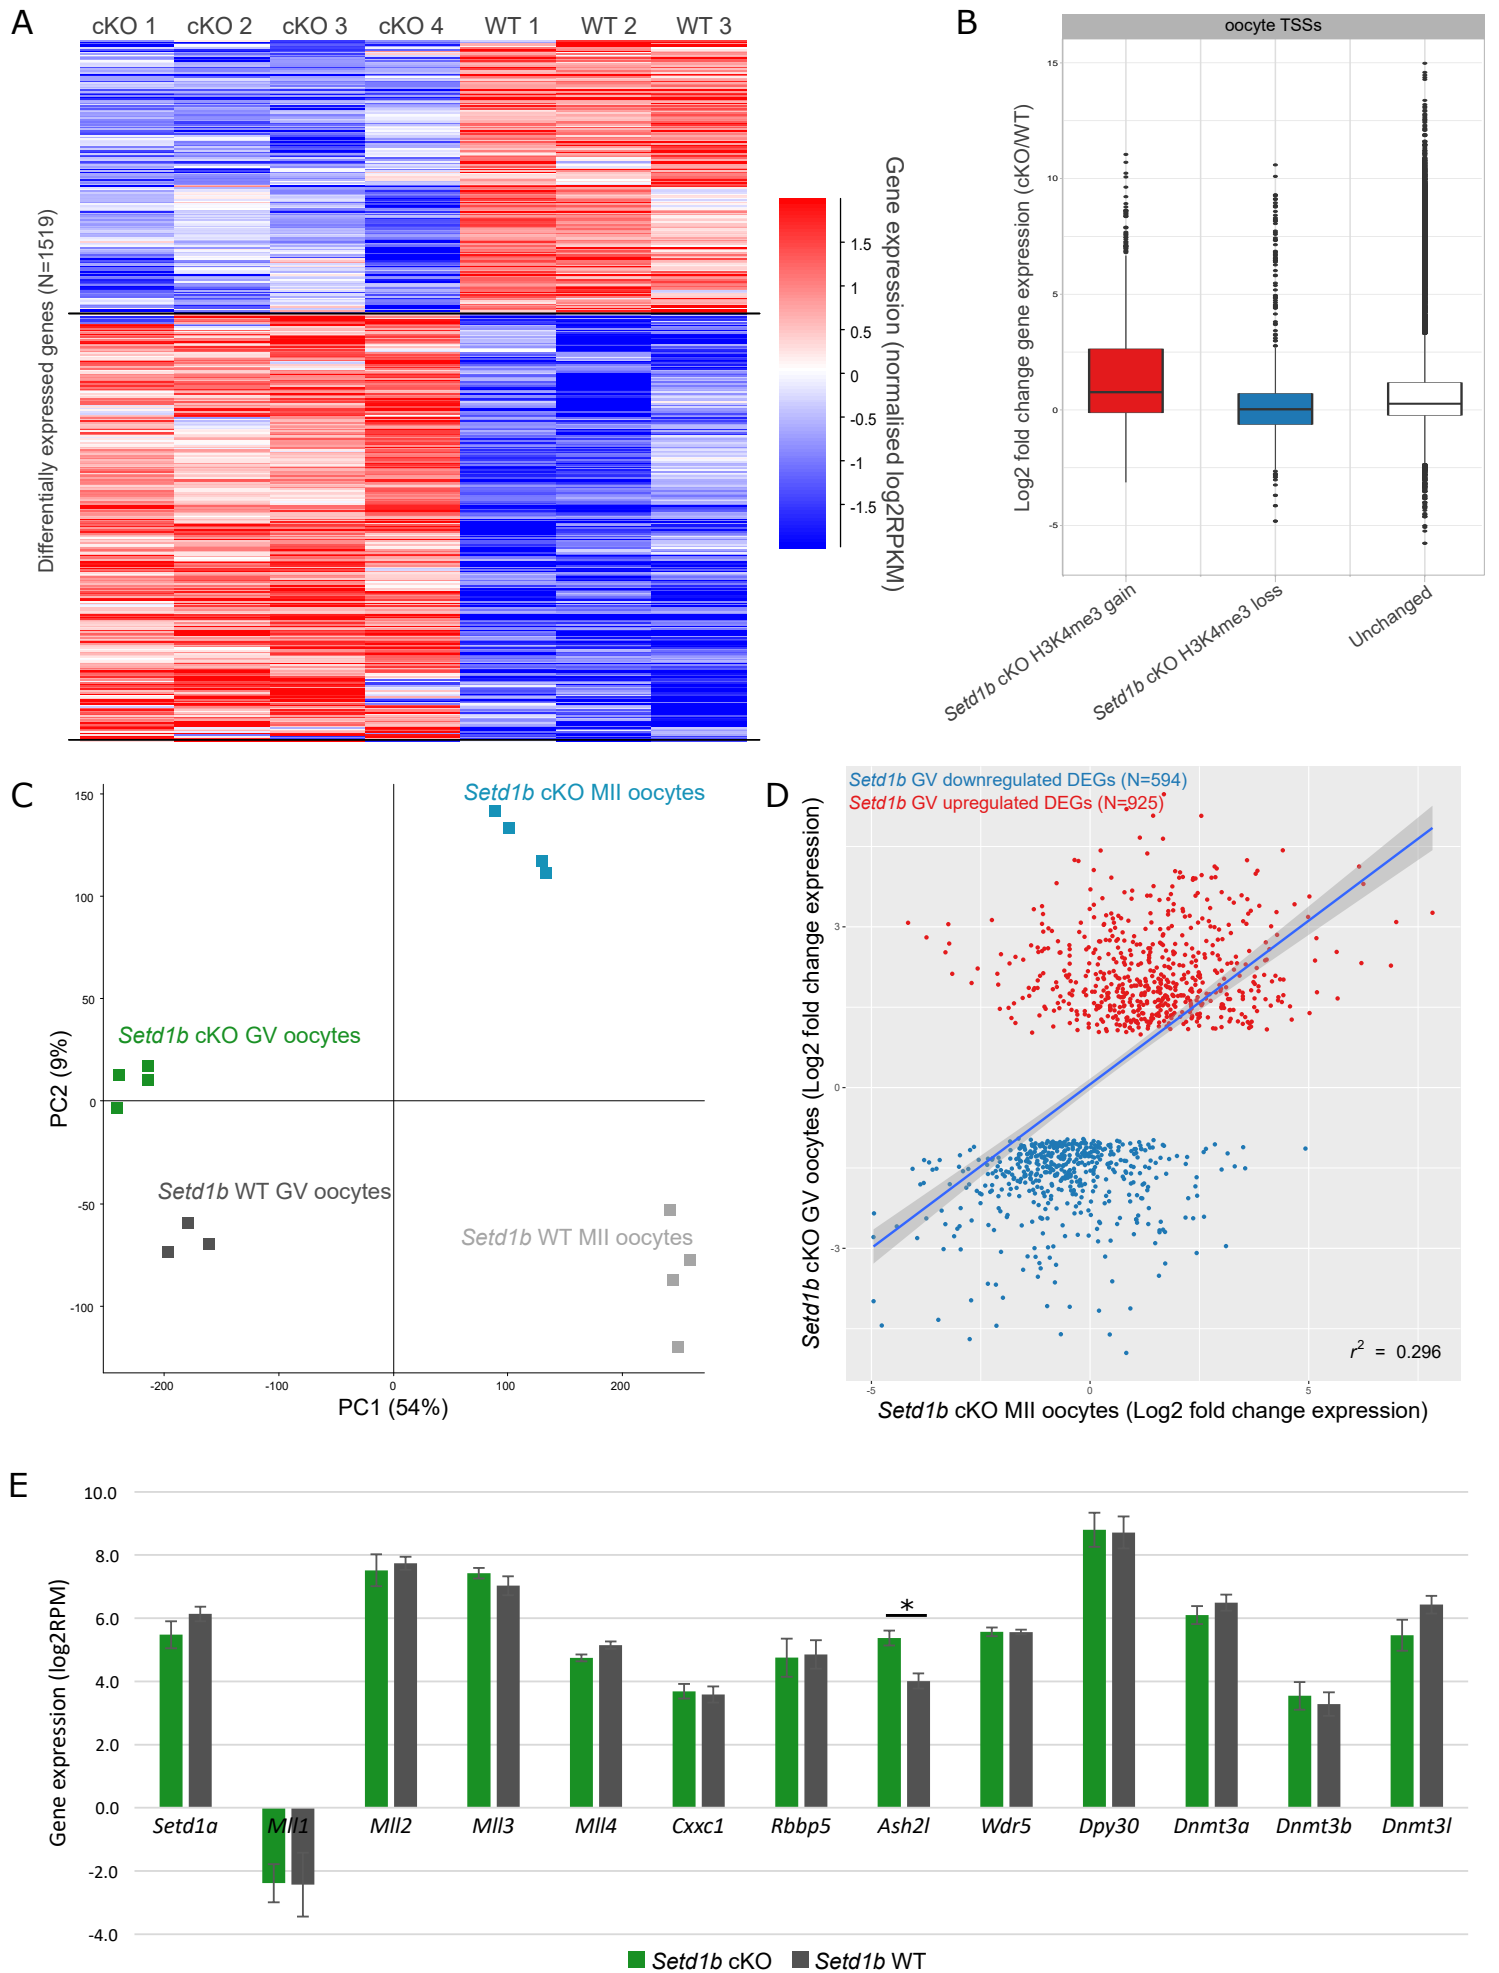

# Supplementary Figure 3

**A**

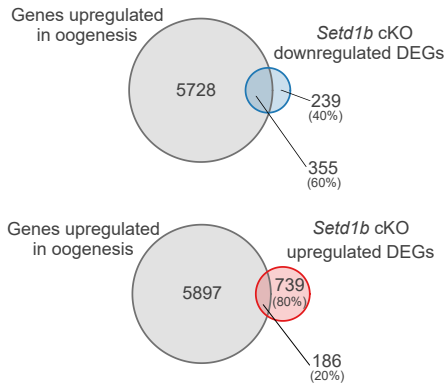

**B**

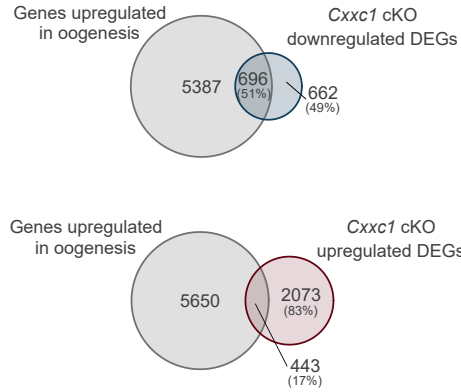

**C**

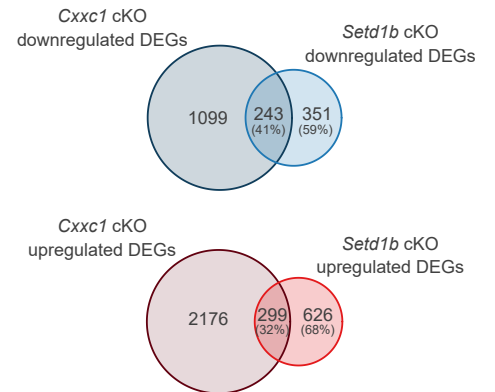

**D**

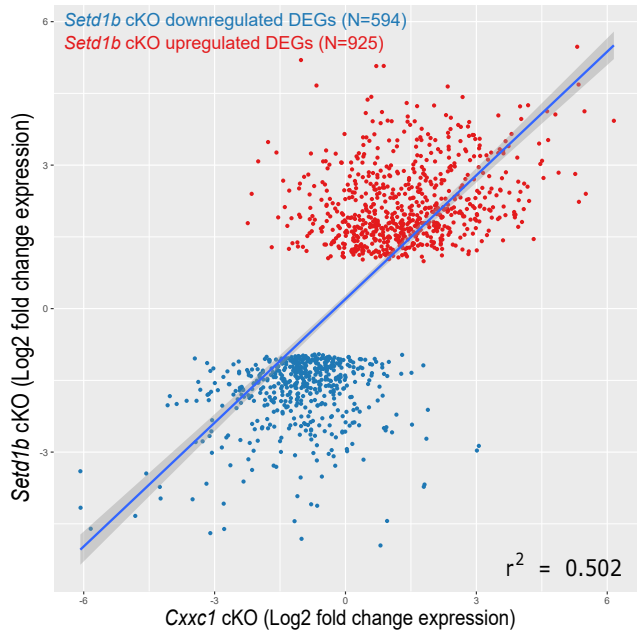

**E**

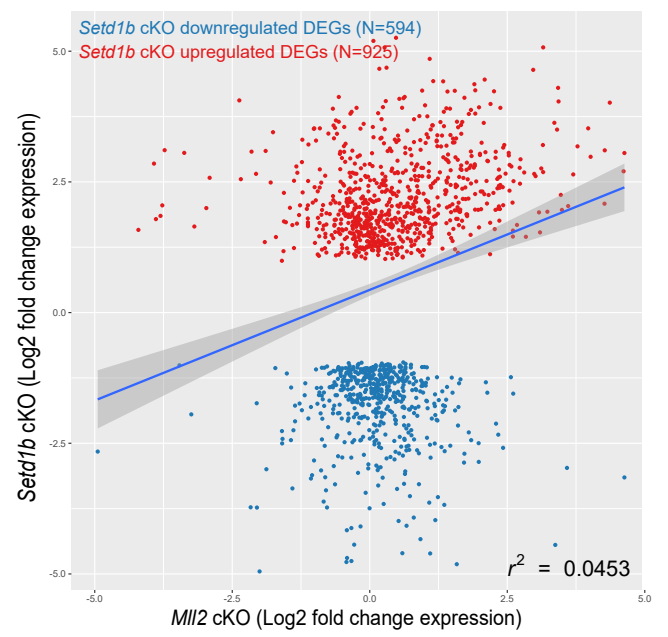

# Supplementary Figure 4

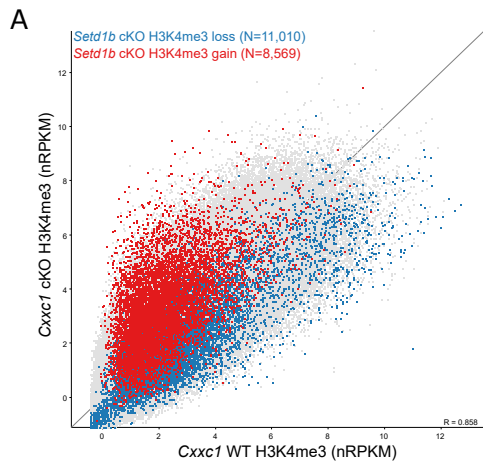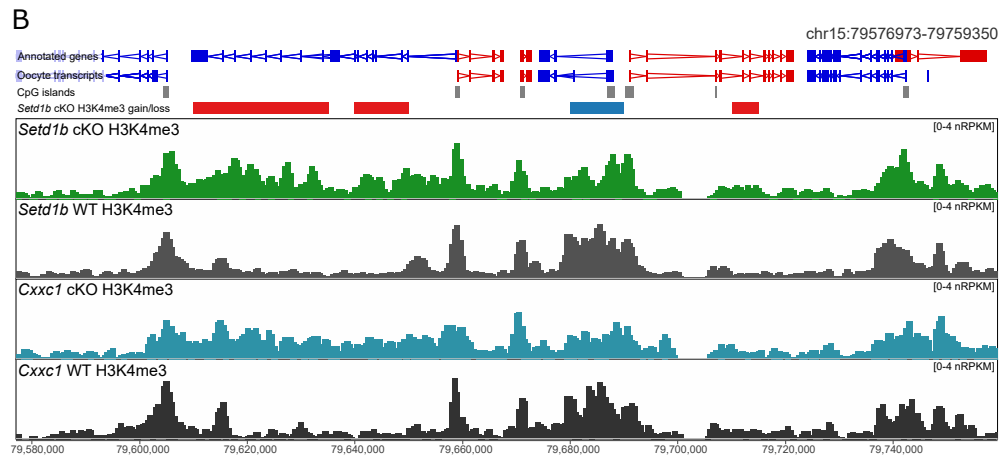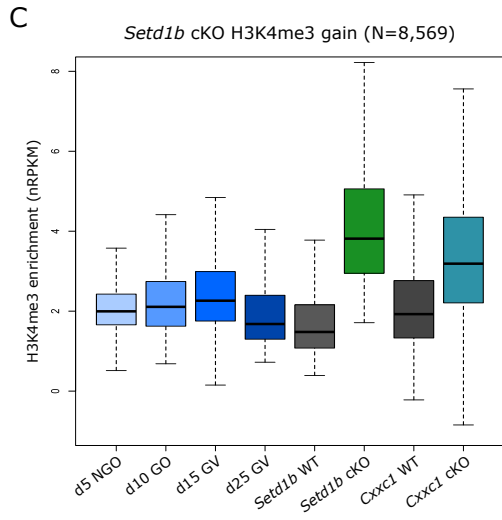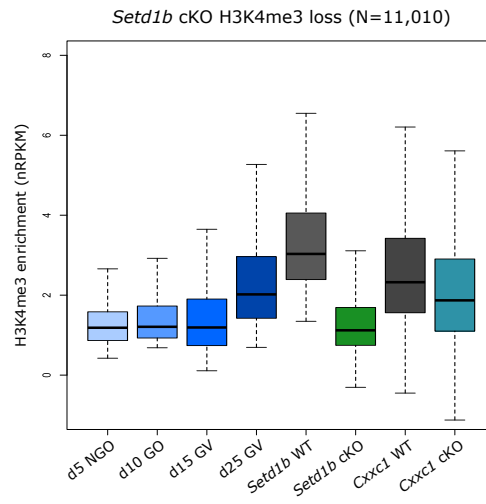

# Supplementary Figure 5

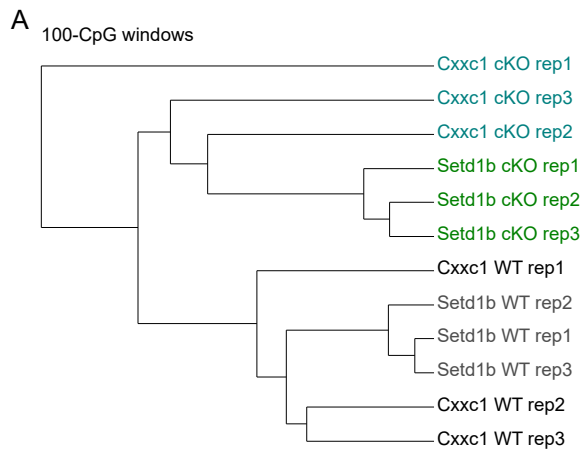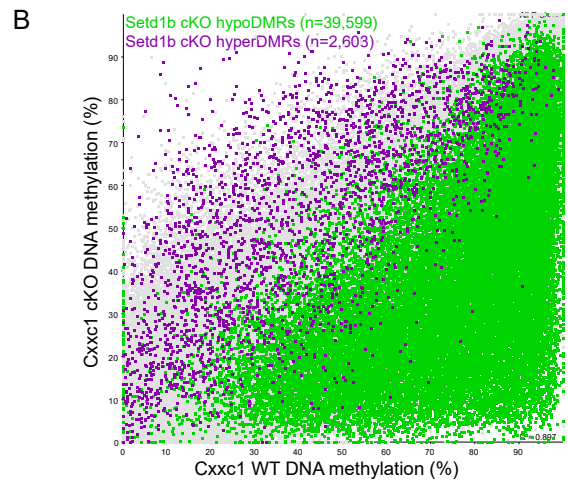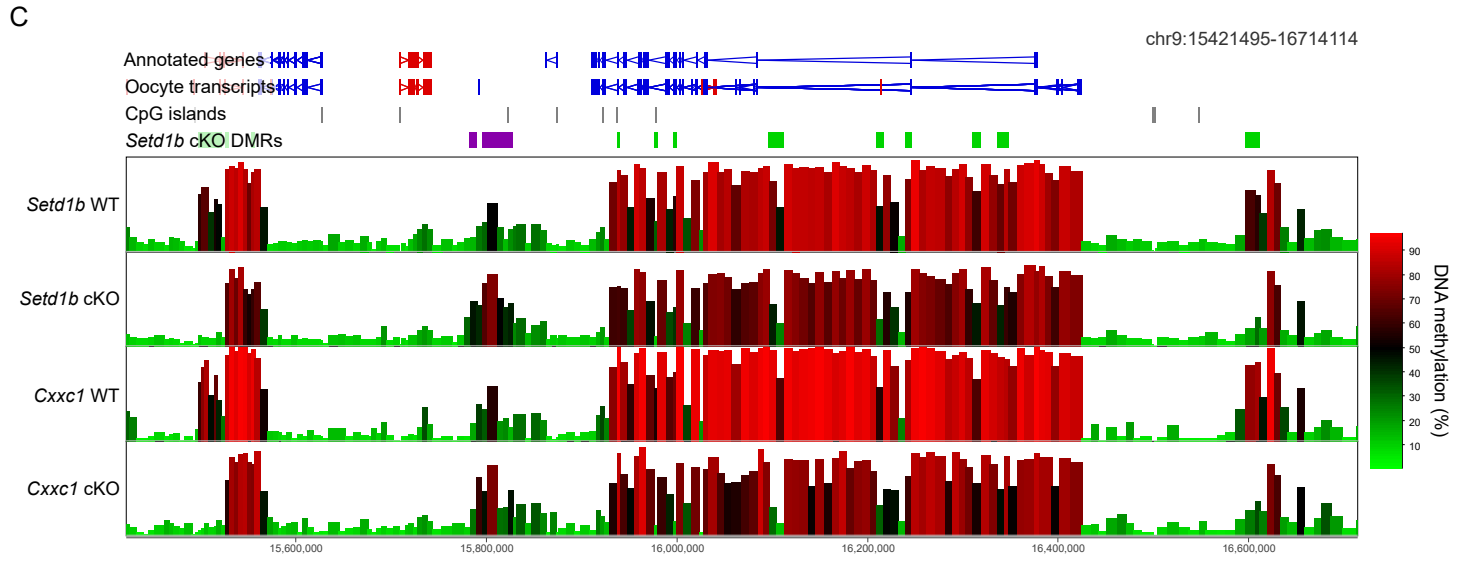

Supplement: gkac051_supplemental_file.pdf [file gkac051_supplemental_file.pdf]
